# Supplementary material for: Synthesis of block or graft copolymers containing poly(styrene derivative) segments by living cationic polymerization using acetal moieties as latent initiating sites
Source: Royal Society of Chemistry journal article supplement (doi:10.1039/c5py00736d), 2015-01-01
Supplement: c5py00736d1.pdf [file c5py00736d1.pdf]

## Electronic Supplementary Information:

### Synthesis of Block or Graft Copolymers Containing Poly(Styrene Derivatives) Segments by Living Cationic Polymerization Using Acetal Moieties as Latent Initiating Sites

*Norifumi Yokoyama, Hirotoshi Yoshida, Arihiro Kanazawa, Shokyoku Kanaoka,  
and Sadahito Aoshima\**

Department of Macromolecular Science, Graduate School of Science, Osaka University,  
Toyonaka, Osaka 560-0043, Japan

Contents:

**Figure S1.** MWD curves for poly(pMeSt)s obtained using the TME/Lewis acid initiating systems

**Figure S2.** MWD curve and <sup>1</sup>H NMR spectrum for polystyrene obtained using the TME-TiCl<sub>4</sub>/SnCl<sub>4</sub> initiating system

**Figure S3.** MWD curves for poly(pMeSt)s obtained using the TME-TiCl<sub>4</sub>/SnCl<sub>4</sub> initiating system

**Figure S4.** MWD curves for the synthesis of poly(IBVE)-*block*-poly(pMeSt) through sequential block copolymerization

**Figure S5.** MWD curves for the synthesis of poly(IBVE-*co*-DMEVE)-*graft*-poly(pMeSt) using poly(IBVE-*co*-DMEVE) as a macroinitiator

**Figure S6.** <sup>1</sup>H NMR spectrum of poly(IBVE-*co*-DMEVE)-*graft*-poly(pMeSt) after hydrolysis

**Figure S7.** DSC thermograms for poly(IBVE-*co*-DMEVE), poly(pMeSt), poly(IBVE)-*block*-poly(pMeSt) and poly(IBVE-*co*-DMEVE)-*graft*-poly(pMeSt)

**Figure S8.** <sup>1</sup>H NMR spectra of poly(IBVE-*co*-DMEVE)-*graft*-poly(pMOS)

**Figure S9.** <sup>1</sup>H NMR spectra of poly(IBVE-*co*-DMEVE)-*graft*-poly(tBOS)

**Figure S10.** MWD curves for the synthesis of poly(IBVE-*co*-DMEVE)-*graft*-poly(tBOS) using poly(IBVE-*co*-DMEVE) as a macroinitiator

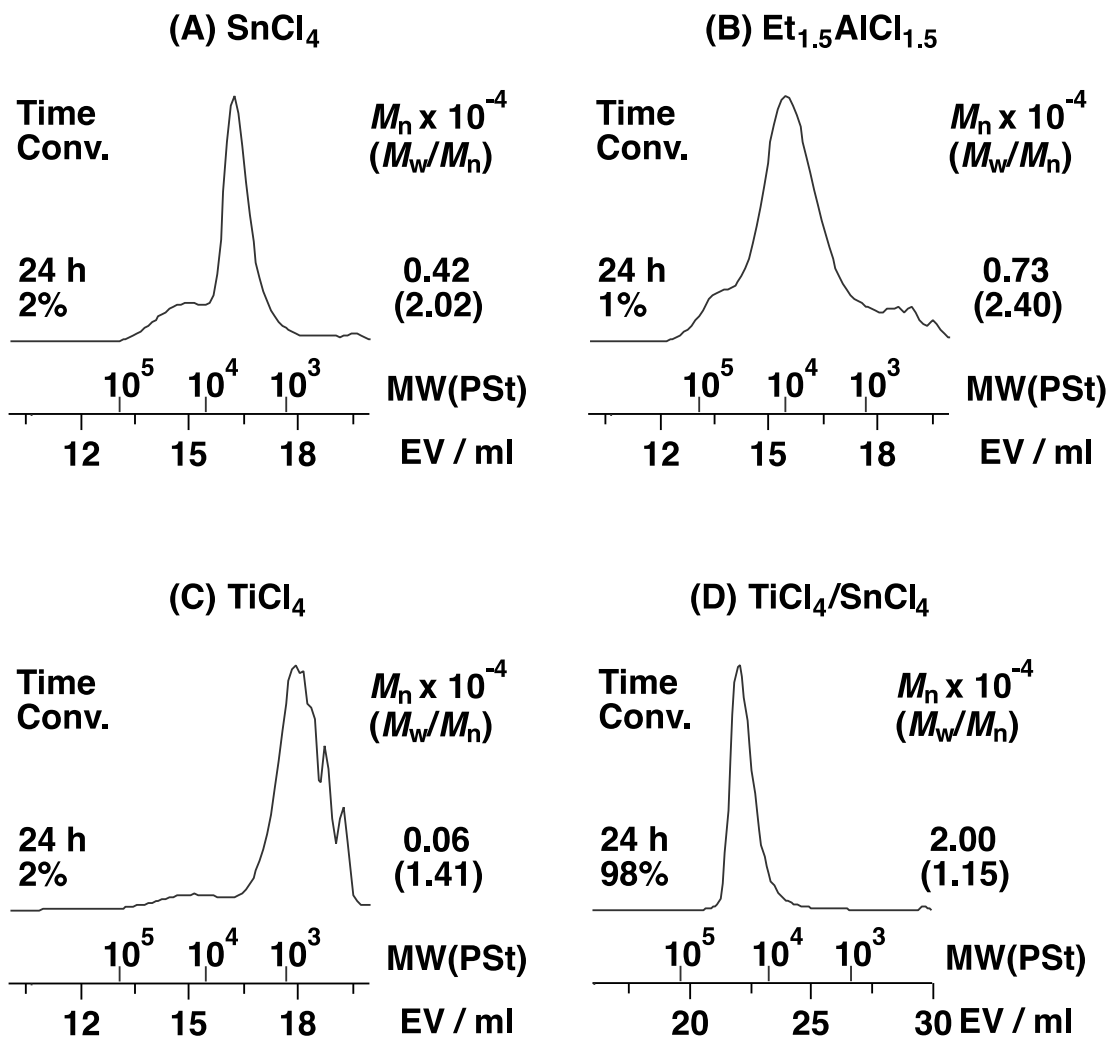

**Figure S1.** MWD curves for poly(pMeSt)s obtained using the TME/Lewis acid initiating systems: [pMeSt]<sub>0</sub> = 0.76 M, [TME]<sub>0</sub> = 4.0 mM, [Lewis Acid]<sub>0</sub> = 20 mM (Et<sub>1.5</sub>AlCl<sub>1.5</sub> and TiCl<sub>4</sub>) or 10 mM (SnCl<sub>4</sub>), or 5.0/10 mM (TiCl<sub>4</sub>/SnCl<sub>4</sub>), [DTBP]<sub>0</sub> = 10 mM, [ethyl acetate] = 50 mM, in CH<sub>2</sub>Cl<sub>2</sub> at 0 °C.

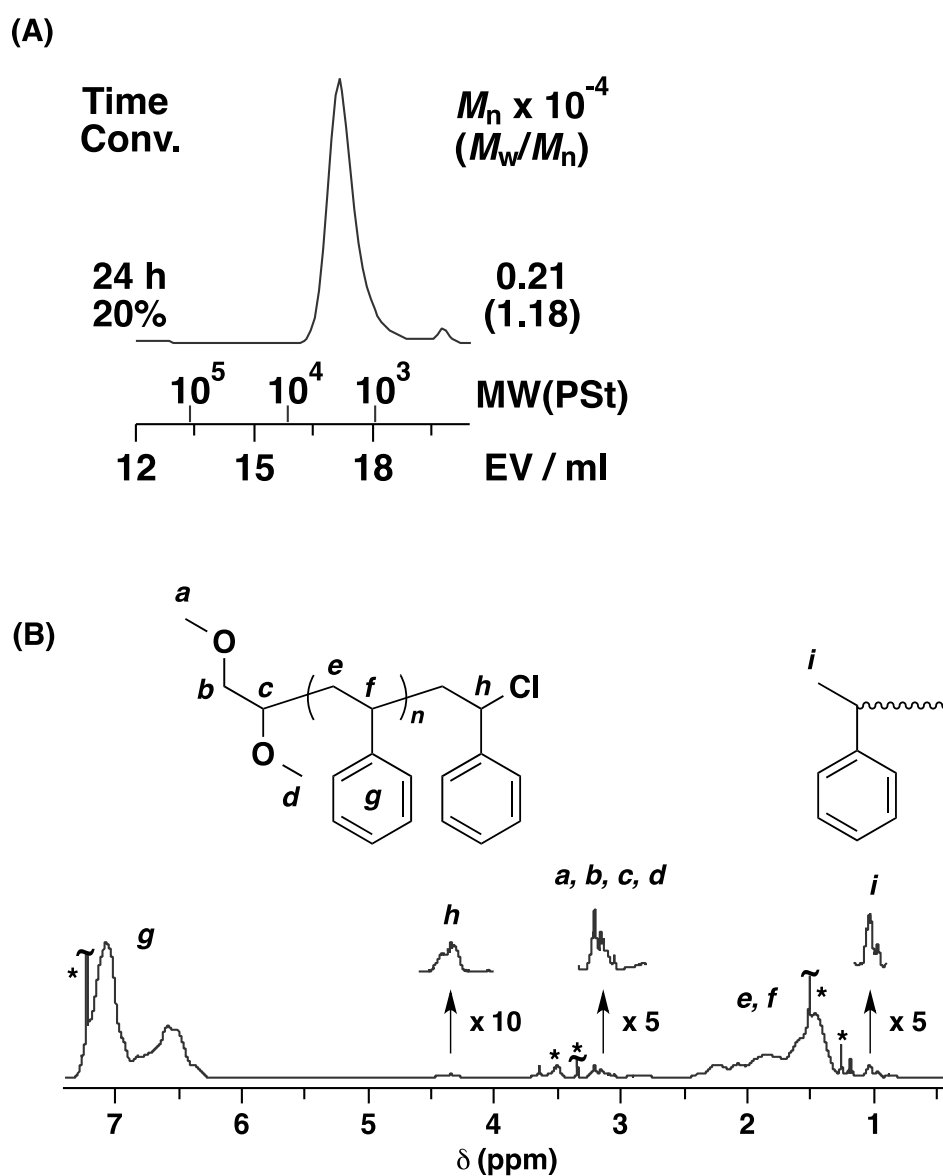

**Figure S2.** (A) MWD curve of the obtained polystyrene using the TME-TiCl<sub>4</sub>/SnCl<sub>4</sub> initiating system: [St]<sub>0</sub> = 0.87 M, [TME]<sub>0</sub> = 4.0 mM, [TiCl<sub>4</sub>]<sub>0</sub> = 5.0 mM, [SnCl<sub>4</sub>]<sub>0</sub> = 20 mM, [DTBP] = 10 mM, [ethyl acetate] = 50 mM, in CH<sub>2</sub>Cl<sub>2</sub> at 0 °C (B) <sup>1</sup>H NMR spectrum of polystyrene (500.16 MHz, CDCl<sub>3</sub>, 30 °C; \* solvent, vaseline, water, etc.).

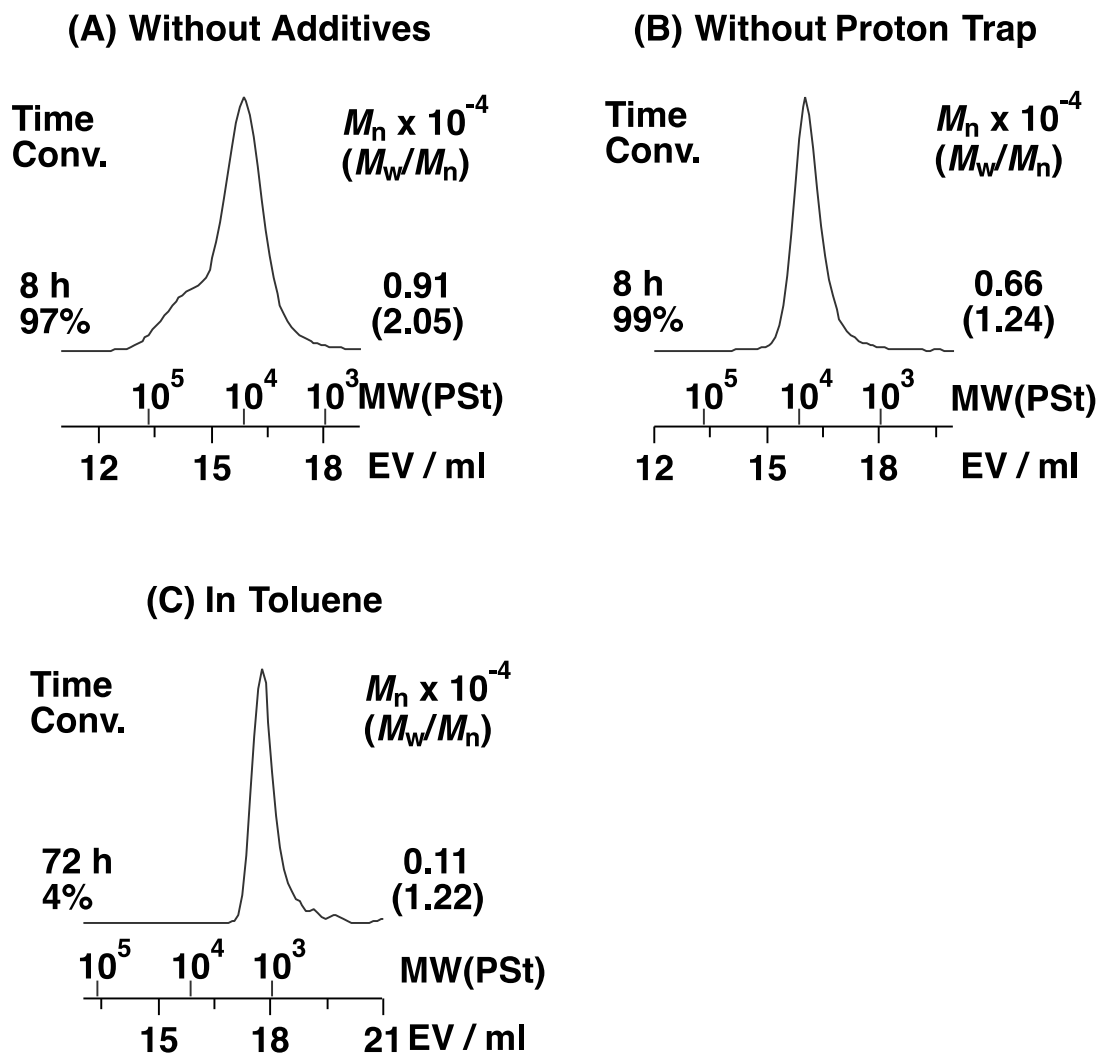

**Figure S3.** MWD curves for poly(pMeSt)s obtained using the TME-TiCl<sub>4</sub>/SnCl<sub>4</sub> initiating system: [pMeSt]<sub>0</sub> = 0.76 M, [TME]<sub>0</sub> = 4.0 mM, [TiCl<sub>4</sub>]<sub>0</sub> = 5.0 mM, [SnCl<sub>4</sub>]<sub>0</sub> = 10 mM, [DTBP] = 0 (A and B) or 10 mM (C), [ethyl acetate] = 0 (A) or 50 mM (B and C), in CH<sub>2</sub>Cl<sub>2</sub> (A and B) or toluene (C) at 0 °C.

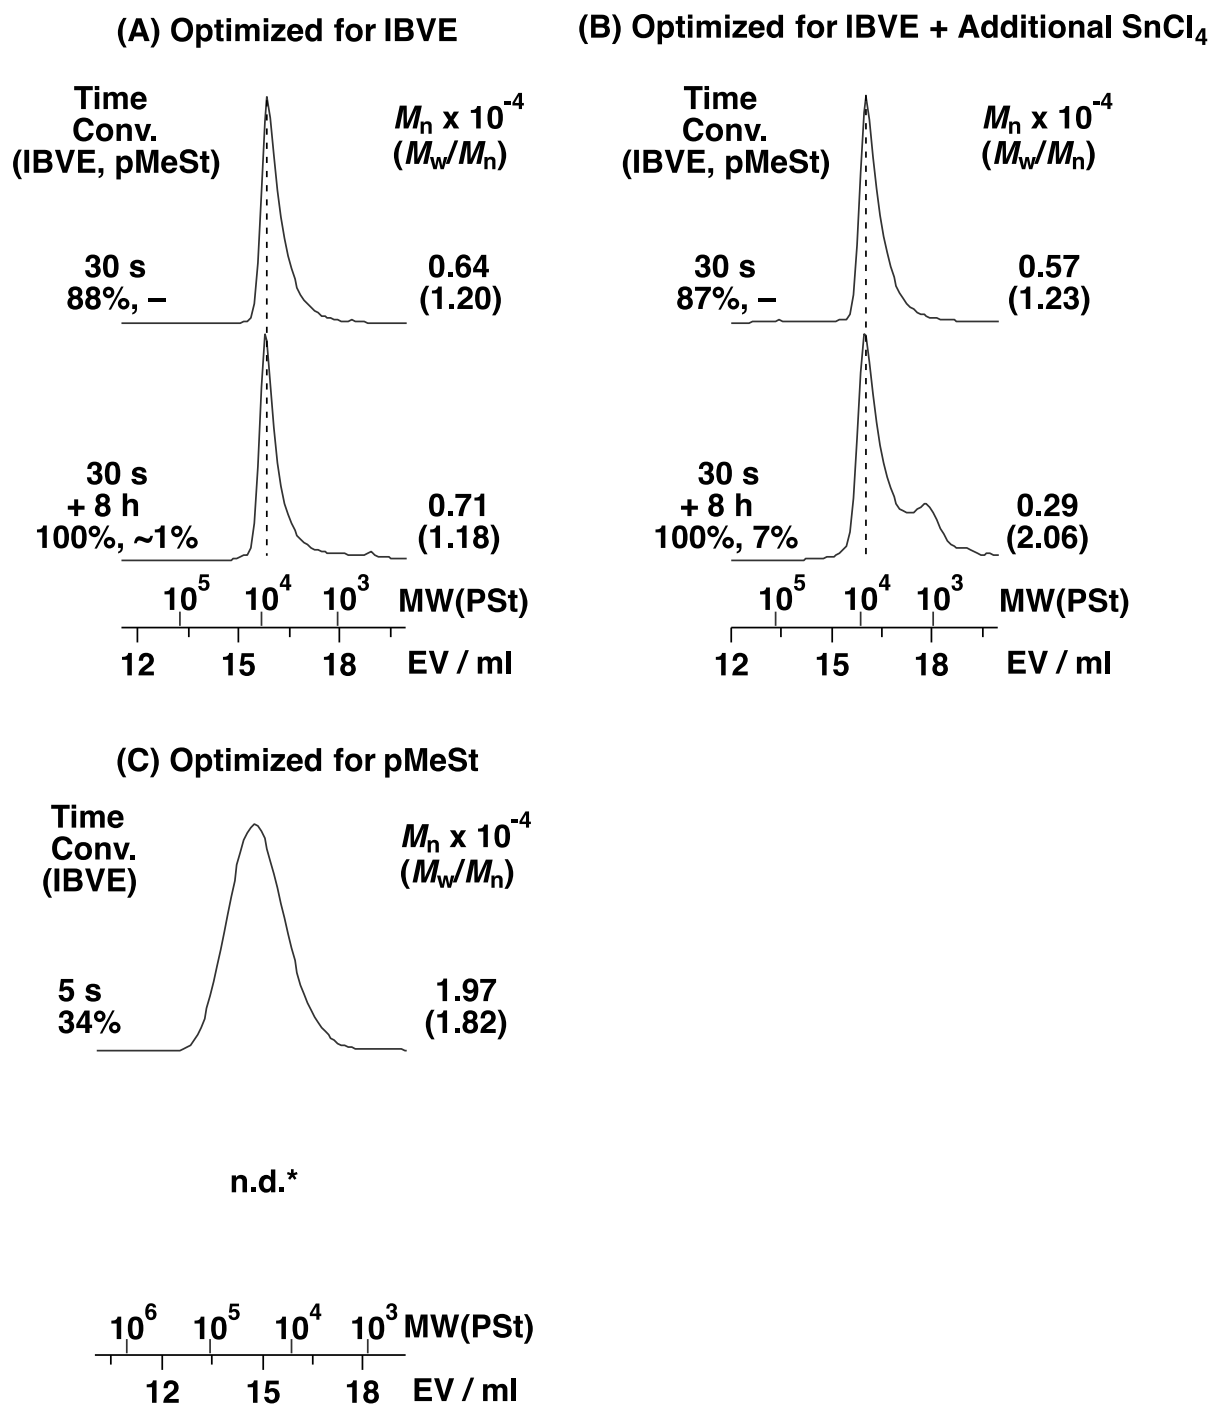

**Figure S4.** MWD curves for the synthesis of poly(IBVE)-*block*-poly(pMeSt) through sequential block copolymerization: (A) [IBVE]<sub>0</sub> = 0.46 M, [IBEA]<sub>0</sub> = 4.0 mM, [Et<sub>1.5</sub>AlCl<sub>1.5</sub>]<sub>0</sub> = 2.5 mM, [SnCl<sub>4</sub>]<sub>0</sub> = 10 mM, [pMeSt]<sub>add</sub> = 0.51 M, [ethyl acetate] = 1.0 M, in toluene at 0 °C (B) [IBVE]<sub>0</sub> = 0.46 M, [IBEA]<sub>0</sub> = 4.0 mM, [EtAlCl<sub>2</sub>]<sub>0</sub> = 2.5 mM, [SnCl<sub>4</sub>]<sub>0</sub> = 10 mM, [pMeSt]<sub>add</sub> = 0.51 M, [SnCl<sub>4</sub>]<sub>add</sub> = 80 mM, [ethyl acetate] = 1.0 M, in toluene at 0 °C (C) [IBVE]<sub>0</sub> = 0.76 M, [IBEA]<sub>0</sub> = 4.0 mM, [Et<sub>1.5</sub>AlCl<sub>1.5</sub>]<sub>0</sub> = 5.0 mM, [ethyl acetate] = 50 mM, in CH<sub>2</sub>Cl<sub>2</sub> at 0 °C. \*The subsequent addition of pMeSt was not conducted because the first segment was not synthesized precisely.

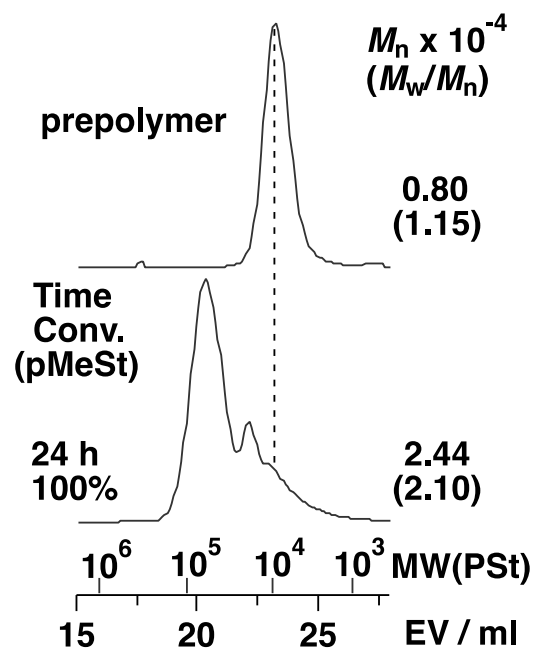

**Figure S5.** MWD curves for the synthesis of poly(IBVE-*co*-DMEVE)-*graft*-poly(pMeSt) using poly(IBVE-*co*-DMEVE) as a macroinitiator: [pMeSt]<sub>0</sub> = 0.76 M, [acetal units]<sub>0</sub> = 4.0 mM, [TiCl<sub>4</sub>]<sub>0</sub> = 10 mM, [SnCl<sub>4</sub>]<sub>0</sub> = 10 mM, [DTBP] = 10 mM, [ethyl acetate] = 50 mM, in CH<sub>2</sub>Cl<sub>2</sub> at 0 °C.

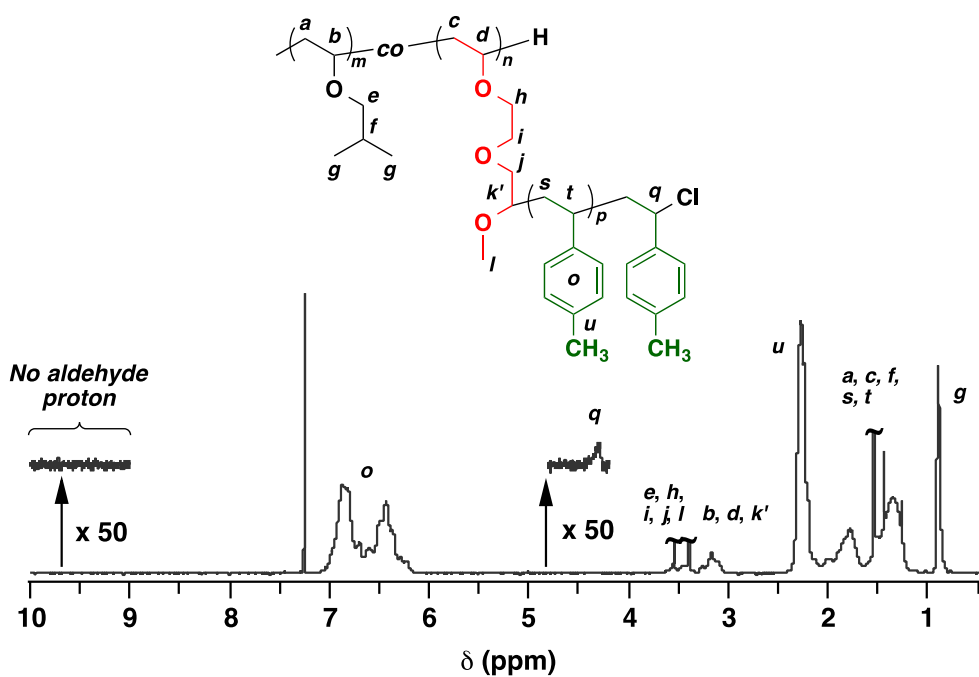

**Figure S6.**  $^1\text{H}$  NMR spectrum of poly(IBVE-*co*-DMEVE)-*graft*-poly(pMeSt) [ $M_n$  (GPC) =  $5.02 \times 10^4$ ,  $M_w/M_n$  (GPC) = 1.24] after hydrolysis<sup>a</sup> (500.16 MHz,  $\text{CDCl}_3$ , 30 °C).

<sup>a</sup> Hydrolysis conditions: [poly(IBVE-*co*-DMEVE)-*graft*-poly(pMeSt)]<sub>0</sub> = 3.0 mg/mL, [HCl]<sub>0</sub> = 0.5 M in 1,2-dimethoxyethane at room temperature.

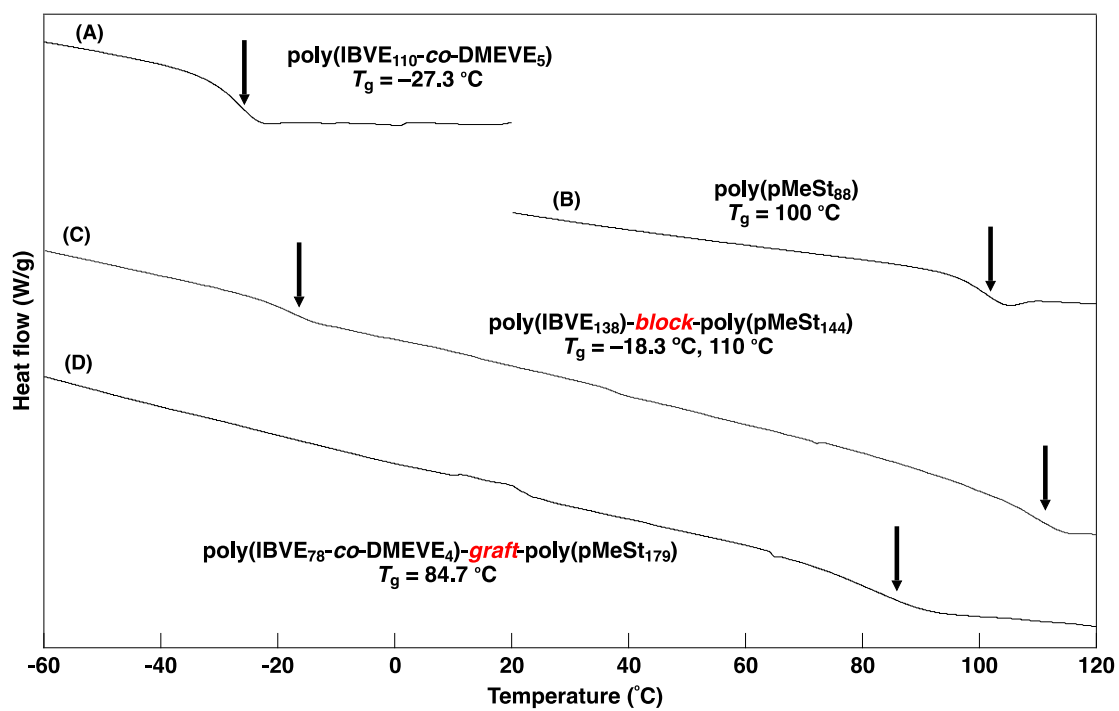

**Figure S7.** DSC thermograms for (A) poly(IBVE<sub>110</sub>-co-DMEVE<sub>5</sub>) ( $M_n = 1.19 \times 10^4$ ,  $M_w/M_n = 1.13$ ), (B) poly(pMeSt<sub>88</sub>) ( $M_n = 1.04 \times 10^4$ ,  $M_w/M_n = 1.19$ ), (C) poly(IBVE<sub>138</sub>)-*block*-poly(pMeSt<sub>144</sub>) ( $M_n = 3.81 \times 10^4$ ,  $M_w/M_n = 1.12$ ) and (D) poly(IBVE<sub>78</sub>-co-DMEVE<sub>4</sub>)-*graft*-poly(pMeSt<sub>179</sub>) ( $M_n = 5.69 \times 10^4$ ,  $M_w/M_n = 1.22$ ).



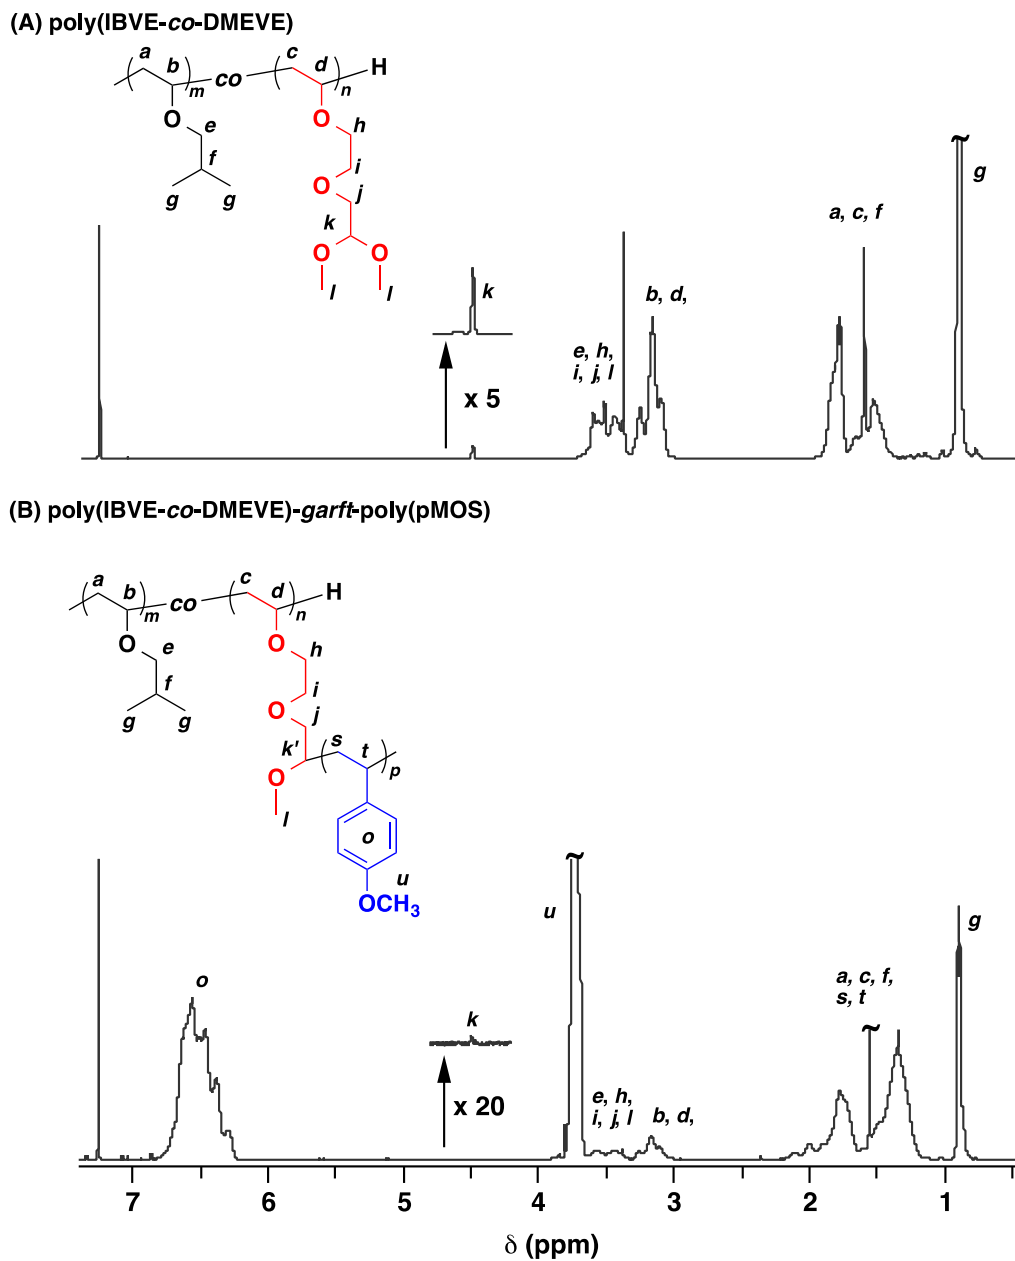

**Figure S8.**  $^1\text{H}$  NMR spectra of poly(IBVE-co-DMEVE)-graft-poly(pMOS) [ $M_n$  (GPC) =  $6.70 \times 10^4$ ,  $M_w/M_n$  (GPC) = 1.30] (B) and the linear macroinitiator [ $M_n$  (GPC) =  $0.87 \times 10^4$ ,  $M_w/M_n$  (GPC) = 1.12] (A) (500.16 MHz,  $\text{CDCl}_3$ , 30 °C).

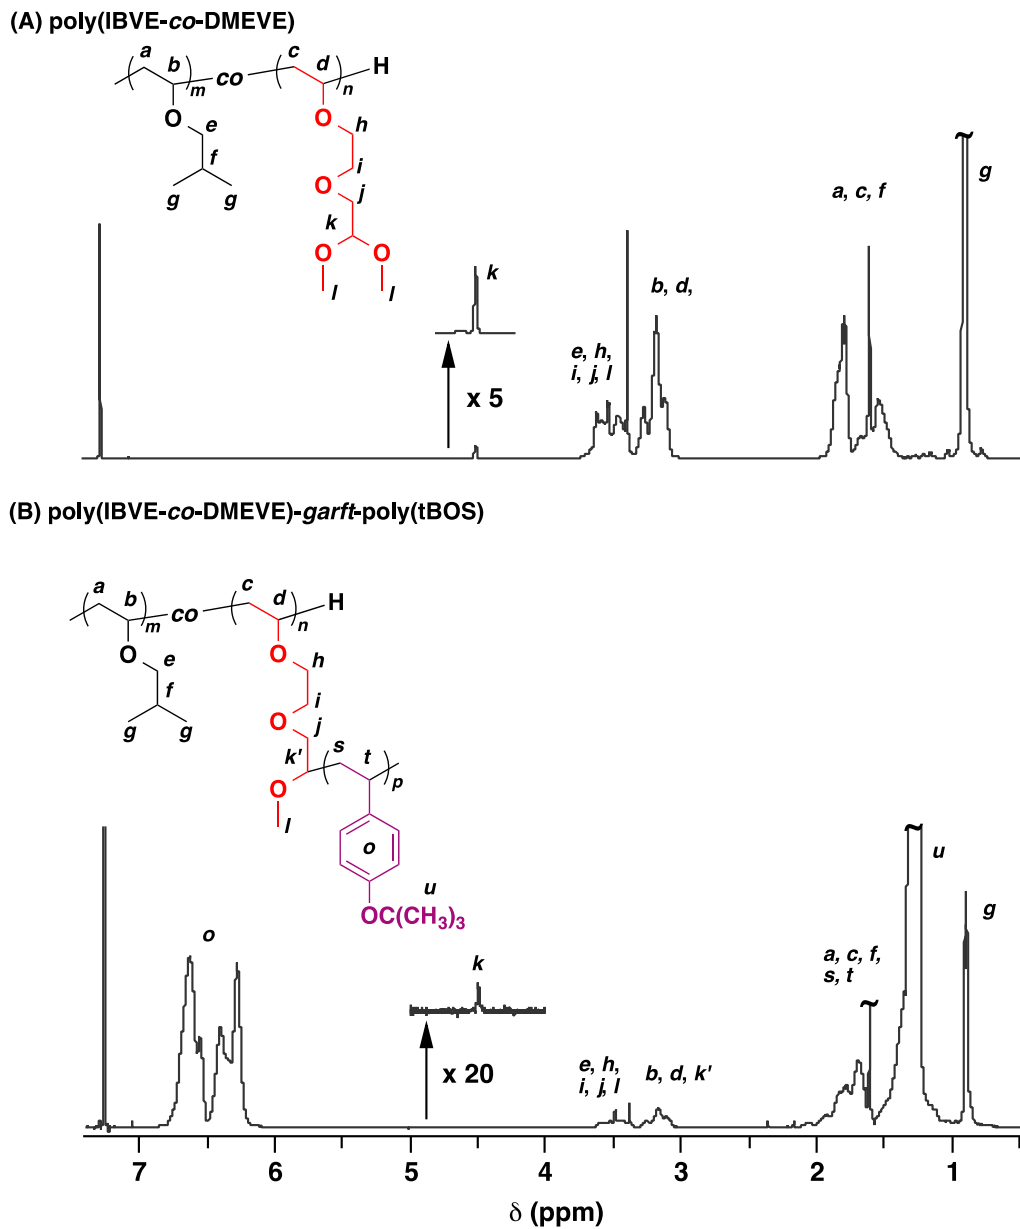

**Figure S9.**  $^1\text{H}$  NMR spectra of poly(IBVE-co-DMEVE)-graft-poly(tBOS) [ $M_n$  (GPC) =  $13.9 \times 10^4$ ,  $M_w/M_n$  (GPC) = 1.58] (B) and the linear macroinitiator [ $M_n$  (GPC) =  $1.69 \times 10^4$ ,  $M_w/M_n$  (GPC) = 1.10] (A) (500.16 MHz,  $\text{CDCl}_3$ , 30 °C).

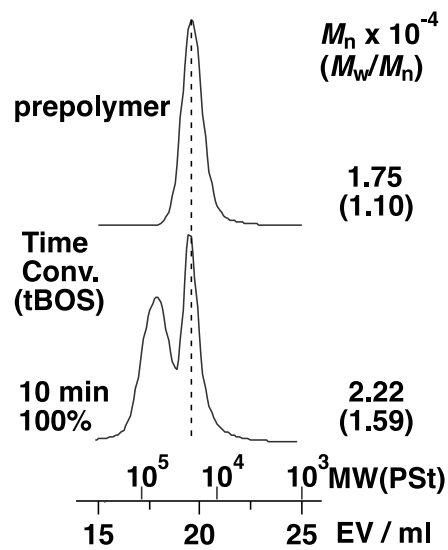

**Figure S10.** MWD curves for the synthesis of poly(IBVE-*co*-DMEVE)-*graft*-poly(tBOS) using poly(IBVE-*co*-DMEVE) as a macroinitiator:  $[tBOS]_0 = 0.53$  M,  $[acetal\ units]_0 = 4.8$  mM,  $[TiCl_4]_0 = 10$  mM,  $[SnCl_4]_0 = 10$  mM,  $[DTBP] = 10$  mM,  $[ethyl\ acetate] = 0.50$  M, in  $CH_2Cl_2$  at  $0$  °C.
